# Supplementary material for: A nanoporous nickel catalyst for selective hydrogenation of carbonates into formic acid in water
Source: Royal Society of Chemistry journal article supplement (doi:10.1039/c6gc02866g), 2016-10-31
Supplement: c6gc02866g1.pdf [file c6gc02866g1.pdf]

## Supporting Information

### **Nanoporous Nickel catalyst for selective hydrogenation of carbonates into formic acid in water**

Tian Wang, <sup>a,1</sup> Dezhang Ren, <sup>a,1</sup> Zhibao Huo, \*, <sup>a</sup> Zhiyuan Song, <sup>a</sup> Fangming Jin, \*, <sup>a, b</sup>  
Mingwei Chen \*, <sup>b</sup> and Luyang Chen<sup>c</sup>

<sup>a</sup> *School of Environmental Science and Engineering, Shanghai Jiao Tong University,  
Shanghai 200240, China*

<sup>b</sup> *State Key Laboratory of Metal Matrix Composites, School of Materials Science and  
Engineering, Shanghai Jiao Tong University, Shanghai 200030, China*

<sup>c</sup> *School of Materials Science and Engineering, East China University of Science and  
Technology, Shanghai 200237, China*

\* Corresponding Author:

Zhibao Huo, E-mail: hzb410@sjtu.edu.cn

Address: School of Environmental Science and Engineering, Shanghai Jiao Tong  
University, 800 Dongchuan RD, Shanghai 200240, China

## Calculation of TON and TOF

The methods to measure TOF and TON are as follows:

$$\text{TOF } (h^{-1}) = \frac{\text{The amount of Formic formed, } mmol \text{ per hour}}{\text{The amount of catalyst, } mmol}$$

$$\text{TON} = \frac{\text{The amount of Formic formed, } mmol}{\text{The amount of catalyst, } mmol}$$

Based on previous literature <sup>1</sup>, we also assume that every surface atom is an active site as an upper limit. For the energetically most stable Ni (111) surface, the density of surface atoms is  $1.86 \times 10^{19}$  atoms/m<sup>2</sup>. And the specific surface area of NiNPore is 62.1 m<sup>2</sup>/g. Then the TOF can be calculated using these values as follows:

$$\text{TOF} = \frac{86.68 \text{ } mmol}{\frac{1.86 \times 10^{19} \text{ atoms/m}^2 \times 62.1 \text{ m}^2 / g \times 13 \text{ mg}}{6.02 \times 10^{23} / mol} \times 2 \text{ h}} \approx 1738 \text{ } h^{-1}$$

$$\text{TON} = 3476$$

### Scheme 1. Calculation of TOF and TON

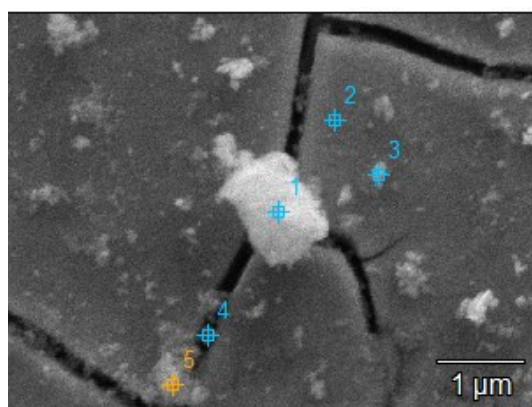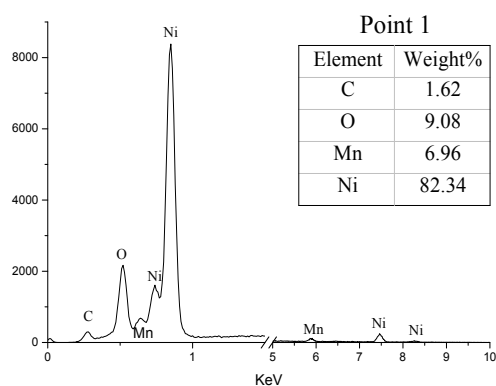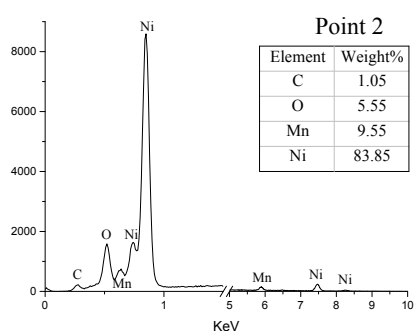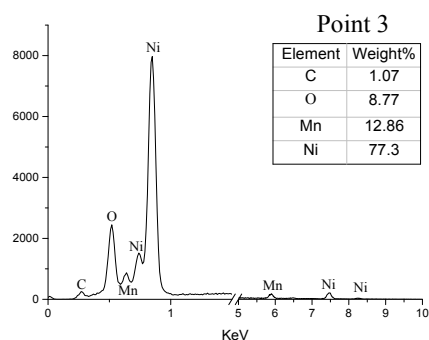

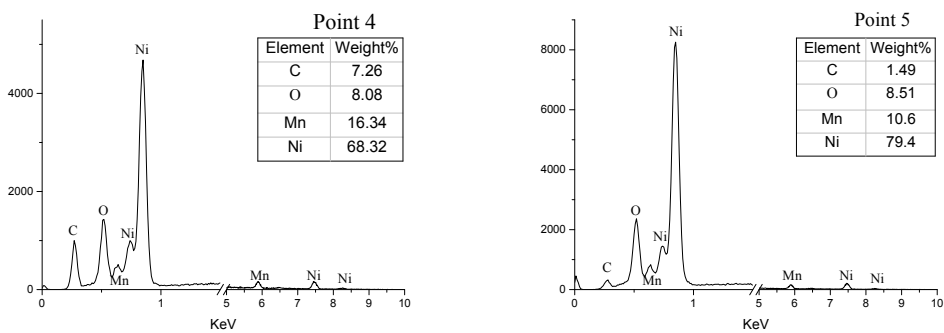

**Figure SI-1.** Energy Dispersive Spectroscopy (EDS) of fresh NiNPore catalyst.

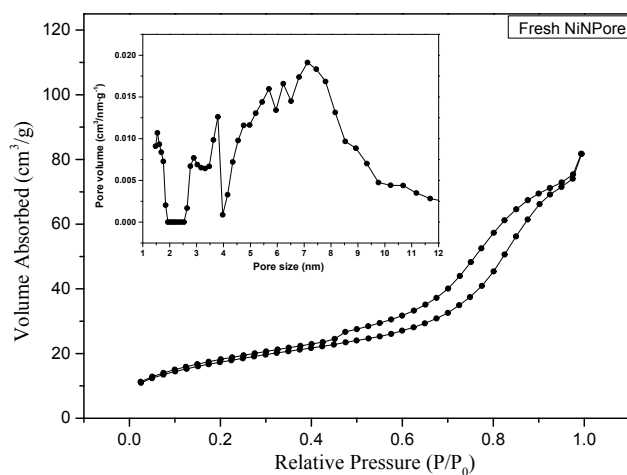

**Figure SI-2.** Nitrogen adsorption/desorption isotherm and corresponding pore size distribution curve (inset) of fresh NiNPore.

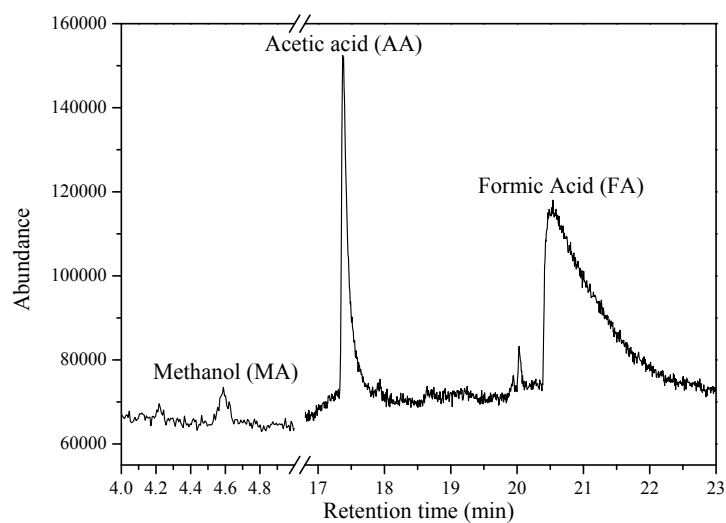

**Figure SI-3.** GC-MS spectrum of liquid samples.

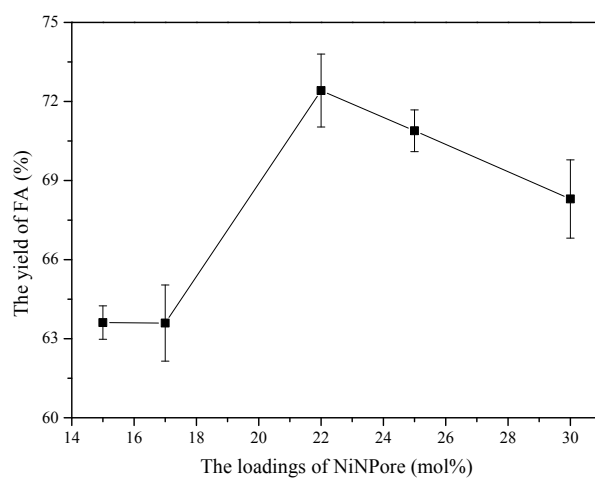

**Figure SI-4.** Effect of NiNPore loading on FA yield.

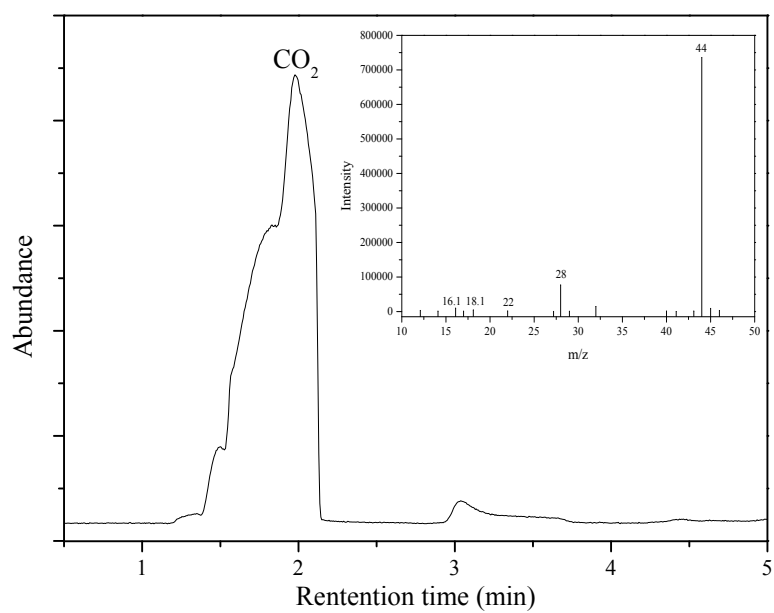

**Figure SI-5.** GC-MS spectrum of confirmed CO<sub>2</sub> (Conditions: HCOONa 1 mmol, NiNPore 15 mol%, H<sub>2</sub> 3 MPa, H<sub>2</sub>O 10 mL, 200 °C, 2 h).

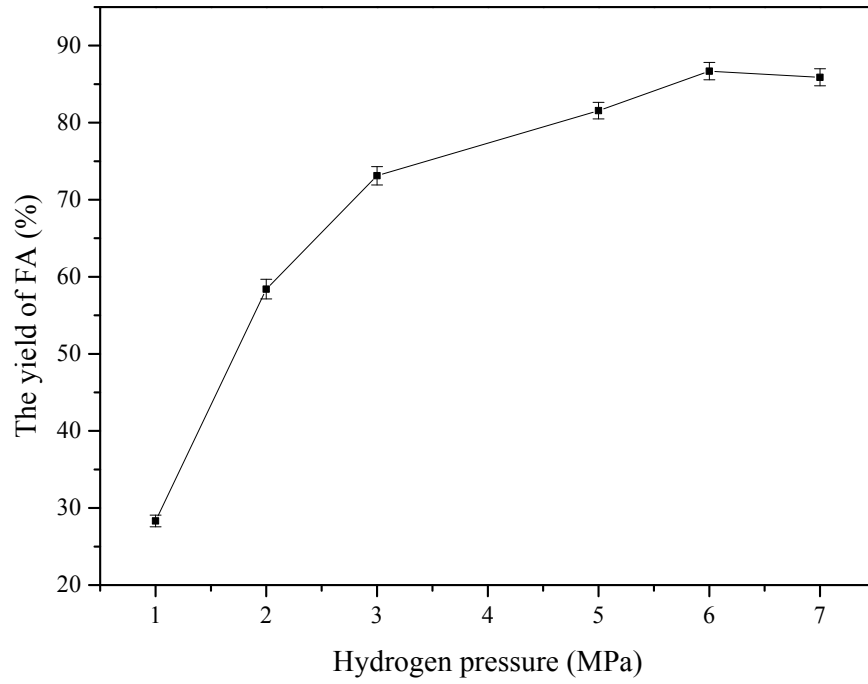

**Figure SI-6.** Effect of hydrogen pressure on FA yield.

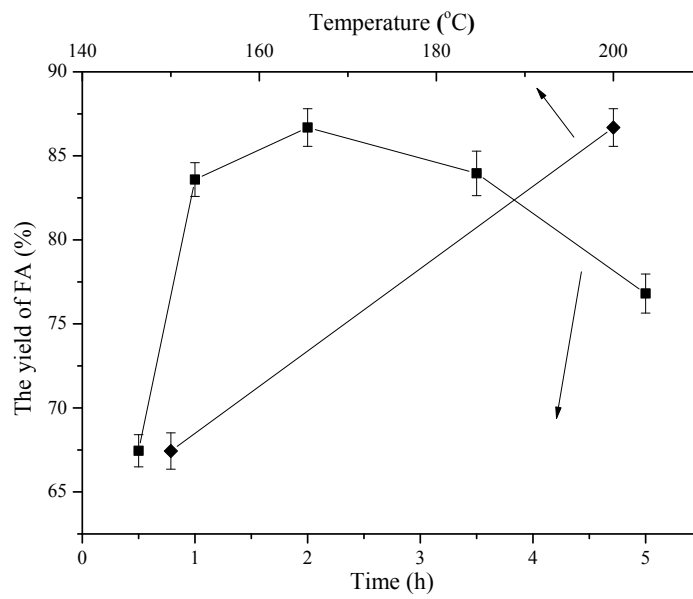

**Figure SI-7.** Effect of temperature and reaction time on FA yield.

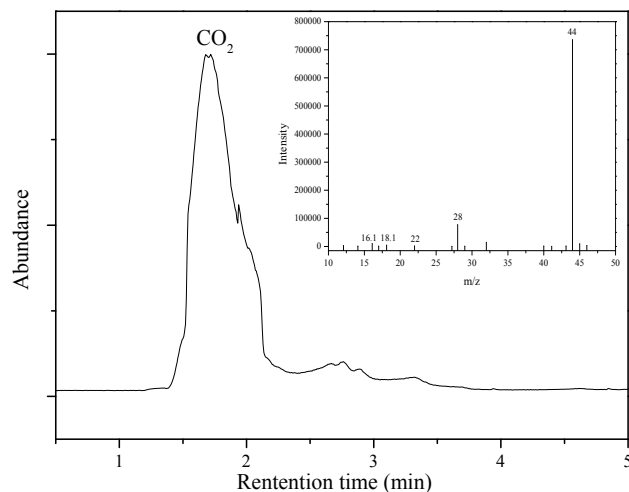

**Figure SI-8.** GC-MS spectrum of confirmed CO<sub>2</sub> (Conditions: HCOONa 1 mmol, NiNPore 22 mol%, H<sub>2</sub> 6 MPa, NEt<sub>3</sub> 2mmol, H<sub>2</sub>O 10 mL, 200 °C, 2 h).

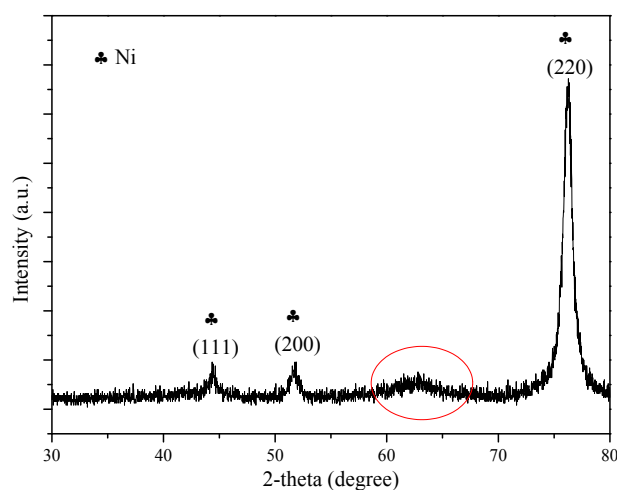

**Figure SI-9.** XRD patterns of fresh NiNPore.

**Table SI-1.** Structural information of catalysts

| Catalyst    | Particle size | Surface area (m <sup>2</sup> /g) | Pore size | FA yield (%) <sup>a</sup> |
|-------------|---------------|----------------------------------|-----------|---------------------------|
| NiNPore     | -             | 62.11                            | 7.1 nm    | 63.2                      |
| Raney Ni    | -             | 15.29                            | ~5 nm     | 60.1                      |
| Al-Ni alloy | -             | 4.32                             | -         | 56.5                      |
| NiO         | -             | 3.91                             | -         | 3.5                       |
| Ni power    | 200 mesh      | 2.63                             | -         | 1.8                       |

<sup>a</sup> Reaction conditions: NaHCO<sub>3</sub> 1 mmol, NiNPore 17 mol%, H<sub>2</sub> 3 MPa, H<sub>2</sub>O 10 mL, 200 °C, 2 h.

**Table SI-2.** Effect of catalyst loading on FA decomposition.<sup>a</sup>

| Entry | Catalyst loading (mol%) | Residual HCOONa (mmol/L) |
|-------|-------------------------|--------------------------|
| 1     | 15                      | 62.4                     |
| 2     | 17                      | 61.3                     |
| 3     | 22                      | 59.6                     |
| 4     | 25                      | 57.3                     |

<sup>a</sup> Reaction conditions: HCOONa 1 mmol (100 mmol/L), H<sub>2</sub> 3 MPa, H<sub>2</sub>O 10 mL, 200 °C, 2 h.

**Table SI-3.** Effect of NEt<sub>3</sub> on FA decomposition.

| Entry | H <sub>2</sub> Pressure | Additive                  | Residual HCOONa (mmol/L) |
|-------|-------------------------|---------------------------|--------------------------|
| 1     | 6                       |                           | 78.7                     |
| 2     | 6                       | NEt <sub>3</sub> (2 mmol) | 68.7                     |

Conditions: HCOONa 1 mmol, NiNPore 22 mol%, H<sub>2</sub>O 10 mL, 200 °C, 2 h.

**Table SI-4.** Ni 2p<sub>3/2</sub> spectral fitting parameter and the ratio of Ni, NiO and Ni(OH)<sub>2</sub> on catalyst surface.

| Catalyst  | Ni 2p <sub>3/2</sub> Peak position (eV) <sup>2,3</sup> |       |                     | Ratio (%) |      |                     | FA yield <sup>a</sup><br>(%) |
|-----------|--------------------------------------------------------|-------|---------------------|-----------|------|---------------------|------------------------------|
|           | Ni                                                     | NiO   | Ni(OH) <sub>2</sub> | Ni        | NiO  | Ni(OH) <sub>2</sub> |                              |
| Fresh     |                                                        |       |                     | 9.8       | 24.3 | 65.9                | 86.6                         |
| 1st cycle | 852.6                                                  | 860.9 | 854.9               | 20.5      | 19.3 | 60.2                | 87.9                         |
| 5th cycle |                                                        |       |                     | 25.6      | 17.7 | 56.7                | 90.5                         |

<sup>a</sup> Condition: NaHCO<sub>3</sub>: 1 mmol, NiNPore: 22 mol%, H<sub>2</sub>: 6 MPa, Solvent: H<sub>2</sub>O 10 mL, 200 °C, 2h.

**Table SI-5.** Investigation of decomposition of HCOONa and HCOONH<sub>4</sub>.

| Entry | material            | Residual (mmol/L) |
|-------|---------------------|-------------------|
| 1     | HCOONa              | 78.7              |
| 2     | HCOONH <sub>4</sub> | 35.8              |

Conditions: feedback 1 mmol, NiNPore 13 mg, H<sub>2</sub> 6 MPa, H<sub>2</sub>O 10 mL, 200 °C, 2 h.

**Reference:**

1. A. Wittstock, V. Zielasek, J. Biener, C. M. Friend and M. Baumer, *Science*, 2010, **327**, 319-322.
2. M. C. Biesinger, B. P. Payne, A. P. Grosvenor, L. W. Lau, A. R. Gerson and R. S. C. Smart, *Appl. Surf. Sci.*, 2011, **257**, 2717-2730.
3. A. P. Grosvenor, M. C. Biesinger, R. S. C. Smart and N. S. McIntyre, *Surf. Sci.*, 2006, **600**, 1771-1779.
